# Supplementary material for: A nitty-gritty aspect of correlation and network inference from gene expression data
Source: PubMed Central journal article supplement (PMC2569917; doi:10.1186/1745-6150-3-35), 2008-08-20
Supplement: 1745-6150-3-35-S1.pdf [file 1745-6150-3-35-S1.pdf]

## Appendix 1. Derivation of the formula (5)

We have

$$\begin{aligned}
& \text{Cov}\left(\frac{1}{\nu}U, \frac{1}{\nu}V\right) = \\
& \mathbb{E}\left(\frac{1}{\nu}\sum_{s=1}^{\nu}X_s\frac{1}{\nu}\sum_{k=1}^{\nu}Y_k\right) - \mathbb{E}\frac{1}{\nu}\sum_{s=1}^{\nu}X_s\mathbb{E}\frac{1}{\nu}\sum_{k=1}^{\nu}Y_k \\
& = \sum_{n=1}^{\infty}\frac{1}{n^2}\sum_{s=1}^n\sum_{k=1}^n\mathbb{E}(X_sY_k)\mathbb{P}\{\nu = n\} - \\
& \sum_{n=1}^{\infty}\frac{1}{n}\sum_{s=1}^n\mathbb{E}X_s\mathbb{P}\{\nu = n\} \\
& \sum_{n=1}^{\infty}\frac{1}{n}\sum_{k=1}^n\mathbb{E}Y_k\mathbb{P}\{\nu = n\}, \tag{1}
\end{aligned}$$

where  $\mathbb{P}$  and  $\mathbb{E}$  are the symbols of probability and expectation, respectively. Consider the first term

$$\begin{aligned}
& \sum_{n=1}^{\infty}\frac{1}{n^2}\sum_{s=1}^n\sum_{k=1}^n\mathbb{E}(X_sY_k)\mathbb{P}\{\nu = n\} = \\
& \sum_{n=1}^{\infty}\frac{1}{n^2}\sum_{s=1}^n\sum_{k=1}^n\mathbb{E}X_s\mathbb{E}Y_k\mathbb{P}\{\nu = n\} \\
& + \sum_{n=1}^{\infty}\frac{1}{n^2}\sum_{s=1}^n\text{Cov}(X_s, Y_s)\mathbb{P}\{\nu = n\} = \\
& \mathbb{E}X\mathbb{E}Y + \text{Cov}(X, Y)\sum_{n=1}^{\infty}\frac{1}{n}\mathbb{P}\{\nu = n\}.
\end{aligned}$$

For the last two terms in (1), we have

$$\begin{aligned}
& \sum_{n=1}^{\infty}\frac{1}{n}\sum_{s=1}^n\mathbb{E}X_s\mathbb{P}\{\nu = n\} = \mathbb{E}X, \\
& \sum_{n=1}^{\infty}\frac{1}{n}\sum_{k=1}^n\mathbb{E}Y_k\mathbb{P}\{\nu = n\} = \mathbb{E}Y.
\end{aligned}$$

It follows from formula (7) that

$$\begin{aligned} & \text{Cov}\left(\frac{1}{\nu}U, \frac{1}{\nu}V\right) \\ &= C \cdot \text{Cov}(X, Y), \end{aligned}$$

where

$$C = \sum_{n=1}^{\infty} \frac{1}{n} \mathbb{P}\{\nu = n\} = \mathbb{E}\left(\frac{1}{\nu}\right)$$

is an unknown constant. Considering the variances of  $U/\nu$  and  $V/\nu$  in a similar way, we arrive at the formulae (5)
